# Supplementary material for: The Quality Inequity of the Ecosystem Services delivered by Green Spaces: Evidence from 226 Urban Parks in Hangzhou, China
Source: Research Square preprint supplement (doi:10.21203/rs.3.rs-6475265/v1), 2025-05-05
Supplement: Supplementary file 1 [file 8fbf66a7b981cc55ac676534.docx]

**Table S1** Classification and Statistics of UPGS

| **Type** | **Definition** | **Remote sensing** | **Number** | **Total area** | **Area range** | **Service radius** |
| --- | --- | --- | --- | --- | --- | --- |
| Small urban park | Small, independent urban green spaces have flexible layouts and simple facilities. They serve residents nearby daily. | 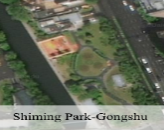 | 115 | 321.171674 | 1ha≤A<5ha | 500 |
| Community park | Small and medium-sized independent urban green spaces with basic facilities mainly serve local community residents for daily nearby leisure. | 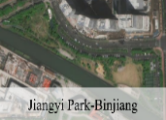 | 41 | 278.206114 | 5ha≤A<10ha | 1000 |
| Regional park | Urban green spaces serving an administrative district's residents feature rich facilities and diverse activities. | 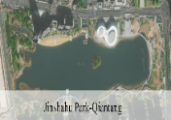 | 29 | 403.426012 | 10ha≤A<20ha | 2000 |
| Urban park | Large scale public urban green spaces serve all city residents with comprehensive facilities and activities. | 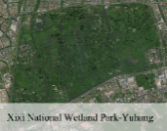 | 41 | 5419.35553 | A≥20ha | 3000 |

**Table S2** Landscape Pattern Index Description

| **Landscape pattern index** | **Calculation formula** | **Type** | **Description** |
| --- | --- | --- | --- |
| NP (Number of patches) |  | Aggregation Index | Describes the number of plaques |
| PD(Patch density) |  | Aggregation Index | Heterogeneity-of-landscape per unit area |
| TE (Total Edge) |  | Marginal Index | The total edge length of the plaque is measured, which helps to measure the complexity of the plaque edge |
| LSI (Landscape Shape Index) |  | Aggregation Index | The ratio between the actual landscape edge length and the assumed minimum edge length |
| CONNECT(Connectance index) |  | Aggregation Index | Functional-connectivity between-landscape-components |
| MESH (Effective Mesh Size) |  | Aggregation Index | Based on the cumulative patch area distribution, the grid size was  calculated when the landscape was maximally subdivided |
| PR(Patch abundance) |  | Diversity  Index | Key indicators of landscape composition and spatial heterogeneity |
| PRD(Patch-abundance density) |  | Diversity  Index | Measure the richness of patch types and the density of spatial distribution in landscape |
| RPR(Relative-patch abundance) |  | Diversity  Index | An indicator of the relative abundance of a patch type in the landscape |

Note: *n* represents the number of landscape patches, *Ni*is the total number of the *i*-th type of landscape patches, the area of the *i*-th patch is *Ai* (*i*=1,2,…,*n*), the total area of the landscape is *AT*,*E*  is the patch boundary, and *cijk* is the connection status between patches*j* and *k* related to patch type *i*within the critical distance.

**Table S3**Weighting of individual PSCI and ILSI indicators

| Types | Parameter | Description | Unit | *R* | Weights |
| --- | --- | --- | --- | --- | --- |
| Park Spatial Characteristic Index(PSCI) | PA | Area occupied by the park | ha | / | 0.061 |
| PC | Shape of park | km | / | 0.0745 |
| PCI | Quantified value of the difference between  the average surface temperature  of the park and its buffer area | / | / | 0.203 |
| GC | Percentage of land area covered by trees or grasses in the park | % | / | 0.0342 |
| PW | Whether there is water within the park | % | / | 0.1559 |
| IC | Percentage of impervious area in the park | % | / | 0.0018 |
| POI | A collection of all POI numbers within the park and its buffer zone | pcs | / | 0.01298 |
| Interior landscape Services Index(ILSI) | NP | Shape of park | N | 0.91 | 0.0393 |
| PD | Heterogeneity of the park per unit area | N/100ha | -0.24 | 0.0085 |
| TE | Area occupied by the park | km | 0.92 | 0.0412 |
| LSI | Shape of park | / | 0.87 | 0.0942 |
| CONNECT | Heterogeneity of the park as a whole | % | -0.28 | 0.016 |
| MESH | The average patch size of the park | / | 0.7 | 0.0642 |
| PR | The diversity of the park landscape | *N* | 0.51 | 0.0302 |
| PRD | The diversity of the park landscape | N/100ha | -0.26 | 0.0273 |
| RPR | The diversity of the park landscape | % | 0.51 | 0.0302 |

Note: In the table, N represents quantity.
